# Supplementary material for: The water–iodine oxide system: a revised mechanism for hydration and dehydration
Source: Royal Society of Chemistry journal article supplement (doi:10.1039/c6ra27854j), 2017-01-01
Supplement: c6ra27854j1.pdf [file c6ra27854j1.pdf]

Supplementary Information

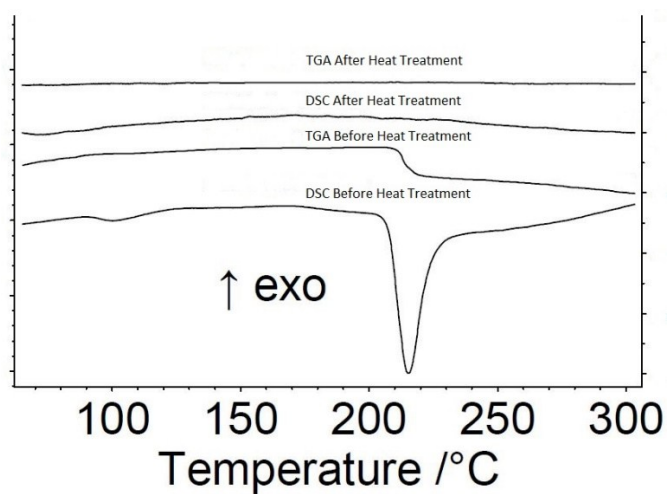

Figure S1. DSC/TGA of  $17\mu\text{m } \text{I}_2\text{O}_5$  before and after heat treatment.

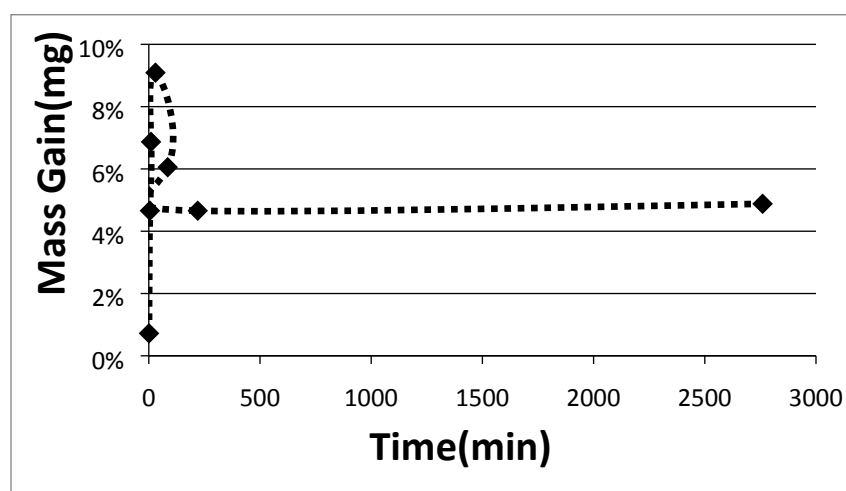

Figure S2. Mass gain percentage as a function of time for  $5\mu\text{m } \text{I}_2\text{O}_5$  up to 2880 minutes

Supplemental Table S1. Concentration of iodic acids in  $17\mu\text{m}$   $\text{I}_2\text{O}_5$  calculated without the assumption that the concentration of  $\text{HIO}_3$  in samples with mass loss greater than 5.11% is 100%. Samples with mass loss greater than 5.11% are underlined. All samples where Eq. 3a and 3b are not applicable are shaded.

| Exposure<br>Time (min) | Calculated Using Eq. 3a and 3b |                             | Calculated Using Eq. 5a and 6a |                             | Total<br>Mass<br>loss(%) |
|------------------------|--------------------------------|-----------------------------|--------------------------------|-----------------------------|--------------------------|
|                        | $X_{\text{HIO}_3}$             | $X_{\text{HI}_3\text{O}_8}$ | $X_{\text{HIO}_3}$             | $X_{\text{HI}_3\text{O}_8}$ |                          |
| 1                      | 0.0%                           | 1.1%                        | 0.4%                           | 1.1%                        | 0.02%                    |
| 5                      | 0.0%                           | 4.5%                        | 1.6%                           | 4.5%                        | 0.08%                    |
| 10                     | 0.0%                           | 3.4%                        | 1.2%                           | 3.4%                        | 0.06%                    |
| 15                     | 47.8%                          | 13.0%                       | 36.4%                          | 13.0%                       | 1.86%                    |
| 30                     | 79.2%                          | 5.7%                        | 54.8%                          | 5.7%                        | 2.80%                    |
| 180                    | 157.2%                         | 12.5%                       | 109.1%                         | 12.5%                       | 5.58%                    |
| 900                    | 217.4%                         | 9.6%                        | 148.2%                         | 9.6%                        | 7.58%                    |
| 2680                   | 249.0%                         | 16.4%                       | 171.7%                         | 16.4%                       | 8.78%                    |

Supplemental Table S2: Concentration of iodic acids in  $5\mu\text{m}$   $\text{I}_2\text{O}_5$  calculated without the assumption that the concentration of  $\text{HIO}_3$  in samples with mass loss greater than 5.11% is 100%. Samples with mass loss greater than 5.11% are underlined. All samples where Eq. 3a and 3b are not applicable are shaded.

| Exposure<br>Time (min) | Calculated Using Eq. 3a and 3b |                             | Calculated Using Eq. 5a and 6a |                             | Total Mass<br>loss(%) |
|------------------------|--------------------------------|-----------------------------|--------------------------------|-----------------------------|-----------------------|
|                        | $X_{\text{HIO}_3}$             | $X_{\text{HI}_3\text{O}_8}$ | $X_{\text{HIO}_3}$             | $X_{\text{HI}_3\text{O}_8}$ |                       |
| 1                      | 32.9%                          | 23.8%                       | 30.1%                          | 23.8%                       | 1.54%                 |
| 5                      | 59.0%                          | 32.3%                       | 50.5%                          | 32.3%                       | 2.58%                 |
| 10                     | 135.8%                         | 16.4%                       | 96.2%                          | 16.4%                       | 4.92%                 |
| 30                     | 139.0%                         | 18.1%                       | 99.0%                          | 18.1%                       | 5.06%                 |
| 85                     | 133.5%                         | 28.3%                       | 98.8%                          | 28.3%                       | 5.05%                 |
| 220                    | 141.1%                         | 27.8%                       | 103.6%                         | 27.8%                       | 5.30%                 |
| 2880                   | 142.9%                         | 23.8%                       | 103.4%                         | 23.8%                       | 5.29%                 |
